# 1 **Assessment and Prediction of Clinical Outcomes for ICU-Admitted Patients Diagnosed with** 2 **Hepatitis: Integrating Sociodemographic and Comorbidity Data.**

3 Dimple Sushma Alluri<sup>1</sup>, and Felix M. Pabon-Rodriguez<sup>1,2\*</sup>

4 <sup>1</sup>Department of Biomedical Engineering and Informatics, Indiana University, Luddy School of Informatics,  
5 Computing, and Engineering, Indianapolis, Indiana, United States

6 <sup>2</sup>Department of Biostatistics and Health Data Science, Indiana University, School of Medicine,  
7 Indianapolis, Indiana, United States

## 8 **Correspondence**

9 \*Felix M. Pabon-Rodriguez

10 Email: [fpabonrodriguez@gmail.com](mailto:fpabonrodriguez@gmail.com)

11

12

## 13 **Abstract**

14 Hepatitis, a leading global health challenge, contributes to over 1.3 million deaths annually, with hepatitis  
15 B and C accounting for the majority of these fatalities. Intensive care unit (ICU) management of patients is  
16 particularly challenging due to the complex clinical care and resource demands. This study focuses on  
17 predicting Length of Stay (LoS) and discharge outcomes for ICU-admitted hepatitis patients using  
18 machine learning models. Despite advancements in ICU predictive analytics, limited research has  
19 specifically addressed hepatitis patients, creating a gap in optimizing care for this population. Leveraging  
20 data from the MIMIC-IV database, which includes around 94,500 ICU patient records, this study uses  
21 sociodemographic details, clinical characteristics, and resource utilization metrics to develop predictive  
22 models. Using Random Forest, Logistic Regression, Gradient Boosting Machines, and Generalized  
23 Additive Model with Negative Binomial Regression, these models identified medications, procedures,  
24 comorbidities, age, and race as key predictors. Total LoS emerged as a pivotal factor in predicting  
25 discharge outcomes and location. These findings provide actionable insights to improve resource  
26 allocation, enhance clinical decision-making, and inform future ICU management strategies for hepatitis  
27 patients.

28 **KEYWORDS:** Hepatitis, predictive models, resource utilization, health disparity, SDOH.

29

30

## 31 **1. INTRODUCTION**

32 Hepatitis, an inflammatory liver disease, remains a significant global health challenge, claiming an  
33 increasing number of lives each year. According to the World Health Organization (WHO) 2024 Global  
34 Hepatitis Report, viral hepatitis is the second leading infectious cause of death globally, responsible for  
35 1.3 million deaths annually. This number has risen from 1.1 million in 2019, with 83% of these deaths  
36 attributed to hepatitis B and 17% to hepatitis C (WHO, 2024). Every day, approximately 3,500 people die  
37 due to hepatitis B and C infections worldwide. Despite advancements in diagnostic tools and treatment  
38 options, testing and treatment coverage rates have plateaued, signaling a growing public health crisis  
39 (WHO, 2024). In the United States, the most common forms of viral hepatitis are hepatitis A, B, and C,  
40 each impacting the liver differently and predominantly affecting distinct populations (CDC, 2024). Hepatitis  
41 B and C pose severe health risks, often leading to chronic conditions such as cirrhosis and liver cancer.  
42 These diseases are also the primary contributors to liver-related mortality globally (WHO, 2023).  
43 Managing intensive care unit (ICU) - admitted patients with hepatitis is particularly challenging due to the  
44 treatment complexities and the resource-intensive nature of care required for severe cases.

45

46 One critical issue in ICU settings is the unpredictability of a patient's length of stay (LoS), a key metric  
47 influencing hospital resource management, patient care quality, and healthcare efficiency. Prolonged ICU  
48 stays are closely linked to increased hospital costs and heightened resource strain (Peres et al., 2020).

49 Research also indicates that longer ICU stays correlate with increased long-term mortality rates,  
50 underscoring the need for precise LoS predictions (Moitra et al., 2015). Beyond LoS, discharge outcomes  
51 and locations serve as vital metrics for assessing patient recovery, readmission risks, and the burden on  
52 healthcare systems (Hickman, 2018). Sociodemographic and clinical factors—including race, gender,  
53 marital status, insurance type, age, and type of hepatitis—significantly influence hospitalization outcomes,  
54 particularly for ICU-admitted hepatitis patients. These factors also play a crucial role in determining  
55 hospital stay duration and discharge outcomes (Arnab Kumar Ghosh et al., 2021; Hayes et al., 2016;  
56 Dubin et al., 2024; Eskandari et al., 2022; Ng et al., 2024).

57 Recent years have seen the growing application of machine learning (ML) in healthcare, particularly for  
58 predictive modeling. ML algorithms provide several advantages over traditional statistical approaches,  
59 including their ability to analyze large, complex datasets and identify subtle patterns that conventional  
60 techniques may overlook (An et al., 2023). Predictive models using ML have been successfully applied in  
61 ICU settings to improve forecasts related to patient outcomes, treatment responses, and resource needs  
62 (Choi et al., 2022; Levin et al., 2020). However, there is a noticeable lack of ML models tailored to  
63 hepatitis patients and their unique clinical profiles.

64 The objective of this research is to explore and develop ML models to predict the length of stay, discharge  
65 location, and discharge outcomes for ICU-admitted hepatitis patients. These models will incorporate  
66 sociodemographic and clinical variables from ICU admission records as key predictors. By addressing  
67 this gap, the study aims to provide actionable insights for healthcare providers, enhancing resource  
68 planning and improving hepatitis patient outcomes in ICU settings.

## 69 **2. MATERIALS AND METHODS**

### 70 **2.1. Data**

71 The data set used for this study was sourced from the Medical Information Mart for Intensive Care  
72 (MIMIC-IV), version 3.0, a comprehensive and deidentified repository of patient records (Johnson et al.,  
73 2024; Johnson et al., 2023; Goldberger et al., 2000). MIMIC-IV comprises data collected from patients  
74 admitted to the emergency department (ED) or intensive care units at the Beth Israel Deaconess Medical  
75 Center (BIDMC) in Boston, MA. It includes over 364,000 unique patient records, with a total of 546,000  
76 hospital admissions and nearly 94,500 ICU stays, providing a rich source of information for developing  
77 predictive models in healthcare. MIMIC-IV is organized into two main data modules: *hosp* and *icu*. The  
78 *hosp* module captures information from the hospital-wide electronic health record (EHR), detailing  
79 hospitalizations, patient demographics, laboratory results, medication administration, billing data, and  
80 more. In contrast, the *icu* module contains highly detailed clinical data from the ICU, sourced from the  
81 MetaVision clinical information system, including treatment plans, and monitoring data (Johnson et al.,  
82 2024; Johnson et al., 2023; Goldberger et al., 2000).

83  
84 Data collection spans from 2008 to 2022, and the records are meticulously de-identified following Health  
85 Insurance Portability and Accountability Act (HIPAA) guidelines. Patient identifiers, such as names and  
86 social security numbers were removed to protect privacy. Additionally, dates of death are available up to  
87 one-year post-discharge and are derived from hospital and state records. Ethical approval for data  
88 collection and the creation of this research resource was obtained from the Institutional Review Board at  
89 the BIDMC. The dataset was made accessible through a data use agreement, ensuring compliance with  
90 all ethical and legal guidelines for data usage. With this agreement in place, the database is available for  
91 researchers and academics.

### 92 **2.2. Variables**

93 The independent variables for this study include socio-demographic, clinical, and resource utilization  
94 data. Socio-demographic variables cover gender, age, race, marital status, and type of insurance.  
95 Admission characteristics include the type of admission and admission location. Clinical variables  
96 included the number of comorbidities, as well as indicators for Hepatitis A, B, C, D, and E, and Hepatic  
97

98 Coma. Resource utilization variables include counts of medications, procedures, and drugs dispensed  
99 before ICU admission. Additional ICU-specific measures capture the volume of fluids prescribed and the  
100 number of procedures performed within the ICU. This study aims to predict three primary outcomes: *Total*  
101 *Length of Stay*, measured as the days spent in the ICU or hospital; *Discharge Location*, detailing the  
102 destination upon discharge, such as home, hospice, or skilled nursing; and *Discharge Outcome*, a binary  
103 variable indicating discharge status (death or alive).

104

### 105 2.3. Data Processing and Preparation

106 Given the extensive and diverse nature of the MIMIC-IV dataset, specific steps were undertaken using  
107 MySQL to refine and tailor the data for this study on hepatitis patients admitted to the ICU (Oracle, 2021).  
108 Figure 1 illustrates the data pre-processing workflow, detailing the sequential steps taken to create the  
109 final dataset.

110

111

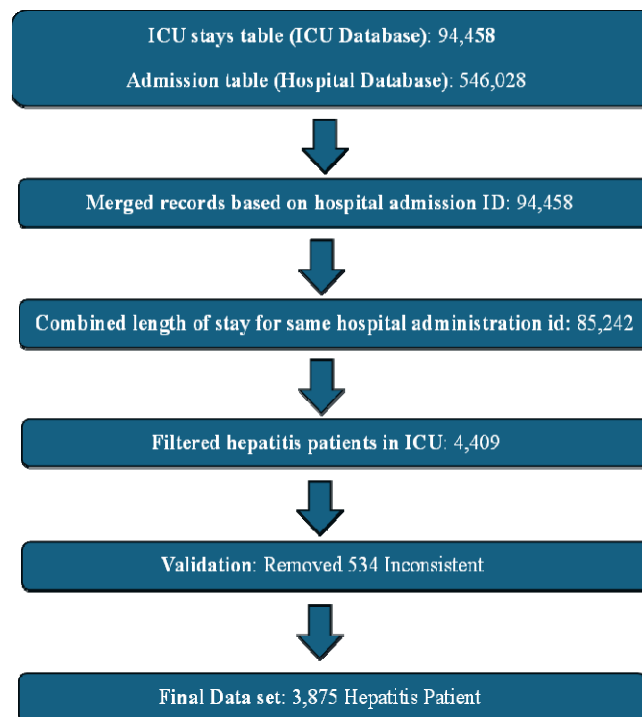

112

113

114 **Figure 1.** Data preprocessing workflow for extracting and refining hepatitis patient records from the  
115 MIMIC-IV database.

116

117 a) **International Classification of Diseases (ICD) Code Filtering and Data Integration:** To isolate  
118 hepatitis-related hospital admissions, ICD codes specific to viral hepatitis were identified and  
119 filtered from a comprehensive table of diagnostic codes. These filtered ICD codes were then  
120 linked with a table containing hospital admission identifiers to extract records corresponding to  
121 hepatitis diagnoses. Subsequently, the table was merged with another table containing patient  
122 demographic information and total length of stay, resulting in a hepatitis-specific patient cohort.

123 b) **Feature Engineering:** To enrich the dataset, several additional variables were calculated. Pre-  
124 ICU and post-ICU medication counts, as well as procedure counts, were derived by aggregating  
125 respective records. For patients with multiple hepatitis diagnoses, individual indicator columns for  
126 Hepatitis A, B, C, D, and E were created, facilitating detailed analysis of co-infections. A  
127 comorbidity count was also computed by excluding hepatitis-related ICD codes and counting the  
128 remaining diagnoses.

- 129 c) **Data Cleaning and Validation:** The combined dataset initially consisted of 4,409 patient records.  
130 A rigorous data validation process identified 534 records with inconsistencies between discharge  
131 outcomes and discharge locations. These records were excluded to ensure data integrity,  
132 resulting in a final dataset of 3,875 hepatitis patient records. Patients included in this analysis  
133 were those admitted to the ICU at Beth Israel Deaconess Medical Center and diagnosed with any  
134 form of hepatitis.
- 135 d) **Data Transformation:** The data transformation phase involved preparing categorical variables for  
136 ML by converting them into factor data types and recategorizing the race variable to address  
137 sparsity and improve interpretability. Subcategories with similar characteristics were grouped  
138 under broader categories, such as combining all Asian subcategories (e.g., "Asian - Chinese,"  
139 "Asian - Indian") into "Asian" and all Black subcategories (e.g., "Black/African," "Black/Caribbean  
140 Island") into "Black." Hispanic/Latino and White subcategories were similarly merged, while  
141 categories with low counts, such as "South American," "Native Hawaiian or Other Pacific  
142 Islander," and "Multiple Race/Ethnicity," were consolidated into an "Other" category.
- 143 e) **Handling Missing Values:** To address missing values, a thorough check was conducted across  
144 all variables, revealing the following counts of missing values per variable: marital status (296),  
145 insurance type (64), number of procedures in the ICU (237), number of pre-ICU procedures  
146 (642), and medications (248), total length of stay (1), and discharge location (18). Multiple  
147 Imputation by Chained Equations (MICE) was employed to impute the missing values (Azur et al.,  
148 2011). Predictive Mean Matching (PMM) was used for numeric columns, while Polytomous  
149 Logistic Regression (Polyreg) was applied to categorical variables with more than two levels. The  
150 imputation process was repeated five times, and the results were pooled to produce a single,  
151 complete dataset for analysis.
- 152 f) **Handling Imbalanced Data:** The discharge outcome variable, which indicates whether patients  
153 were alive or deceased upon discharge, displayed a significant class imbalance, with 3,353  
154 records for the alive category and 522 for death. To address this, the Synthetic Minority  
155 Oversampling Technique (SMOTE) was used to balance the classes (Pradipta et al., 2021). This  
156 resulted in a revised dataset with 2,088 records labeled as alive and 1,566 as death, ensuring a  
157 more equitable representation of both classes for model training.
- 158 g) **Training and Test Data:** After data cleaning and preprocessing, the records were partitioned for  
159 subsequent modeling tasks. An 80:20 split was used to separate the data into training and testing  
160 sets, a crucial step for evaluating model performance.
- 161 I. For the *Discharge Outcome*, after applying SMOTE to address class imbalance, a total of  
162 3,654 records were obtained. Of these, 2,923 records (80%) were used for training, and  
163 731 records (20%) were allocated for testing. The training set was used to train the  
164 models, while the testing set was reserved to evaluate predictive performance.
- 165 II. For *Length of Stay* and *Discharge Location*, 3,875 records were available. The same  
166 partitioning strategy was applied, with 3,100 records (80%) used for training and 775  
167 records (20%) for testing. This partition ensured that models could be appropriately  
168 trained and assessed for their predictive ability across different outcomes.

#### 170 2.4. Machine Learning Models

171 For predicting the discharge outcome (death or alive), the discharge location variable was not used as  
172 predictor for the analysis. This decision was made because certain discharge location categories  
173 overlapped with death records, providing redundant information. The following models were considered:

- 174 a) **Model 1: Logistic Regression:** It is a statistical model used for binary classification, estimating  
175 the probability of one of two possible outcomes (in this case alive or death) based on a set of  
176 predictor variables. This model uses the logistic function to transform predictions into probabilities  
177 between 0 and 1 (Stoltzfus, 2011). Logistic Regression was chosen for its interpretability,  
178 providing clear insights into how each clinical and socio-demographic feature influences  
179 discharge outcome. This characteristic is especially valuable in this research, where

180 understanding the relative impact of individual predictors on patient survival is crucial for making  
181 informed inferences about patient care.

182 b) **Model 2: Random Forest Classification:** This model was applied to enhance the accuracy of  
183 predicting discharge outcome. The model constructs multiple decision trees using random data  
184 samples, with each tree voting for a class. The final prediction is determined by the majority vote  
185 across all trees. This ensemble approach captures complex, non-linear relationships among  
186 variables, offering strong predictive performance and minimizing the risk of overfitting (Wrld,  
187 2024). Although it does not offer the interpretive insights of Logistic Regression, Random Forest's  
188 capability to handle heterogeneous data makes it well-suited for maximizing predictive power in  
189 clinical scenarios (Couronné et al. 2018).

190 To predict LoS for ICU-admitted hepatitis patients, we considered two scenarios. In the first case, we  
191 considered LoS as a count variable (Fernandez & Vatcheva, 2022), and as a continuous variable (Xu et  
192 al., 2022) in our second case, allowing for a comprehensive exploration of different modeling approaches.

193 a) **Model 1: Generalized Additive Model (GAM) with Negative Binomial (NB) Distribution:** For  
194 the discrete case, a GAM with a NB distribution was utilized to address overdispersion, where the  
195 variance in the count data exceeds the mean (Zeileis et al., 2015). By incorporating smooth  
196 functions, the GAM framework allowed for modeling potential non-linear relationships between  
197 predictors and LoS. This approach provided the necessary flexibility to capture complex patterns  
198 in the data, ensuring a robust and accurate analysis (Hastie & Tibshirani, 2014).

199 b) **Model 2: Random Forest Regression:** For the continuous case, Random Forest Regression  
200 was employed. This ensemble method constructs multiple decision trees and averages their  
201 predictions to capture non-linear relationships and interactions among predictors (Wrld, 2024).  
202 Using Random Forest provided an alternative view, enabling a performance comparison between  
203 the count-based and continuous modeling approaches.

204 To predict the discharge location of ICU-admitted hepatitis patients, models were trained after excluding  
205 discharge outcome variable which is not relevant to this analysis.

206 a) **Model 1: Gradient Boosting Model (GBM):** Gradient Boosting is an ensemble learning  
207 technique that builds multiple decision trees sequentially, with each new tree correcting errors  
208 made by the previous ones. This model focuses on reducing bias and improving predictive  
209 performance through boosting. GBM was chosen for its strong ability to handle complex, non-  
210 linear relationships and provide high accuracy (Zhang et al. 2019), which is critical in predicting  
211 discharge locations, a multi-class categorical outcome.

212 b) **Model 2: Multinomial Logistic Regression:** Multinomial Logistic Regression is an extension of  
213 logistic regression used when the dependent variable has more than two categories (Kwak &  
214 Clayton-Matthews, 2002). It models the probability of each class as a function of the predictors,  
215 providing a straightforward and interpretable approach to multi-class classification. This model  
216 was included to establish baseline and offer a simpler, interpretable model for understanding the  
217 impact of predictor variables on different discharge locations.

## 218 219 **2.5. Model Evaluation**

220 The models were evaluated using appropriate performance metrics based on the type of outcome  
221 variable:

222 • **Regression Models:** For LoS, regression models were evaluated using Root Mean Squared  
223 Error (RMSE), R-squared ( $R^2$ ), and Mean Absolute Error (MAE). RMSE measures the average  
224 magnitude of error between predicted and actual values, penalizing larger deviations more  
225 heavily, making it particularly sensitive to outliers.  $R^2$  quantifies the proportion of variation in the  
226 dependent variable explained by the model, offering an overall measure of fit. MAE, unlike

- 227 RMSE, calculates the average of the absolute errors, providing an intuitive measure of model  
228 accuracy by treating all errors equally (Zwanenburg, 2022).
- 229 • **Multiclass Classification Models:** These were assessed using Accuracy, the Kappa statistic,  
230 the Brier Score, and the Area Under the Receiver Operating Characteristic Curve (ROC AUC).  
231 Accuracy reflects the percentage of correctly classified instances, while the Kappa statistic  
232 accounts for agreement by chance, providing a more robust evaluation of model performance.  
233 The Brier Score measures the mean squared difference between predicted probabilities and the  
234 actual class, with lower scores indicating better calibration. ROC AUC quantifies a model's ability  
235 to distinguish between classes, with values closer to 1 denoting superior performance  
236 (Zwanenburg, 2022).
  - 237 • **Binary Classification Models:** For binary outcomes, Logistic Regression and Random Forest  
238 Classification models were evaluated using Brier Score, Accuracy, Kappa, ROC AUC, Sensitivity,  
239 and Specificity. Sensitivity, also known as recall, indicates the proportion of true positives  
240 correctly identified by the model, while Specificity measures the proportion of true negatives  
241 correctly identified. These metrics provide insights into the model's ability to balance false  
242 positives and false negatives. The Brier Score evaluates the accuracy of probabilistic predictions,  
243 with lower values reflecting better performance. ROC AUC measures the discriminatory power of  
244 the model across thresholds, while Accuracy and Kappa offer overall measures of correctness,  
245 with Kappa adjusting for chance agreement (Zwanenburg, 2022).

## 246 2.6. Resampling Techniques

247 To ensure the robustness and generalizability of the models, 10-fold cross-validation was employed. This  
248 approach divides the dataset into 10 subsets (or folds). The model is trained on 9 folds and validated on  
249 the remaining fold in each iteration. This process is repeated 10 times, with each fold serving as the  
250 validation set once, and the average performance across all iterations is reported. The choice of K=10 is  
251 supported by experimental analysis and observations, as it provides a balance between computational  
252 efficiency and reliability (Verma et al., 2024). K-fold cross-validation is critical for mitigating the risk of  
253 overfitting, as it ensures that the model is tested on diverse subsets of the data, not just a single train-test  
254 split. This approach provides a more reliable estimate of the model's performance on unseen data by  
255 leveraging all data points for both training and validation at different stages. Particularly for complex  
256 datasets, such as the one used in this study, 10-fold cross-validation enhances the reliability and  
257 generalizability of the results, making it a robust validation strategy for machine learning applications  
258 (Wilimitis & Walsh, 2023).

## 260 2.7. Software

261 Data analysis was conducted in RStudio (R Core Team, 2024; RStudio Team, 2022) using various  
262 packages to streamline data manipulation, model development, and visualization. MySQL (Oracle, 2024)  
263 was used to extract and manage data from the MIMIC-IV database. In RStudio, data processing was  
264 performed using the *tidyverse* (Wickham et al., 2019), while missing data were imputed with *mice* (Buuren  
265 & Groothuis-Oudshoorn, 2011), and class imbalance was addressed using *DMwR* (Torgo, 2024). Model  
266 development and evaluation were facilitated by *MachineShop* (Smith, 2024), enabling a streamlined  
267 approach to implementing and comparing various predictive models. Statistical modeling was conducted  
268 using *MASS* (Venables & Ripley, 2002), which supported the fitting of Negative Binomial regression  
269 models, and *mgcv* (Wood, 2011), which was utilized for constructing Generalized Additive Models (GAMs)  
270 to capture nonlinear relationships. Random Forest modeling was implemented using the *randomForest*  
271 package (Liaw & Wiener, 2002). Data visualizations were created with *ggplot2* (Wickham, 2016), while  
272 descriptive statistics and baseline characteristics were summarized using *tableone* (Yoshida & Bartel,  
273 2022).

274  
275  
276  
277  
278

279 **3. RESULTS**

280 **3.1. Demographic and Descriptive Statistics**

281 The study included a total of 3,875 patients admitted to the ICU with hepatitis-related conditions. The  
 282 gender distribution was predominantly male, accounting for 68.2% (n = 2,644) of the sample, while  
 283 females constituted 31.8% (n = 1,231). The average age of the participants was 53.26 years (SD =  
 284 12.77). The racial composition was primarily White (57.3%, n = 2,220), followed by Black (16.9%, n =  
 285 653), Hispanic/Latino (6.3%, n = 245), and Asian (6.0%, n = 234). Other racial groups, such as  
 286 Indian/Alaska Native and Portuguese, made up a smaller proportion of the population, each representing  
 287 less than 1% of the sample. These demographic characteristics, along with details on marital status,  
 288 insurance type, clinical and admission characteristics, are summarized in **Table 1**. The distribution of  
 289 hepatitis types is shown in **Figure 2**, which reveals that Hepatitis C was the most prevalent condition,  
 290 affecting 82.2% (n = 3,186) of the total sample. Hepatitis B was the second most common condition at  
 291 19.3% (n = 746), while Hepatitis A (1.0%, n = 37), Hepatitis D (9.2%, n = 357), and Hepatitis E (0.1%, n =  
 292 3) were less frequent. Additionally, 8.0% (n = 311) of patients experienced hepatic coma.

293 *Table 1. Baseline demographic, clinical, and admission characteristics of study participants*

|                              |               |
|------------------------------|---------------|
| N                            | 3,875         |
| <b>GENDER = Male (%)</b>     | 2644 (68.2)   |
| <b>AGE (MEAN (SD))</b>       | 53.26 (12.77) |
| <b>RACE (%)</b>              |               |
| INDIAN/ALASKA NATIVE         | 10 (0.3)      |
| ASIAN                        | 234 (6.0)     |
| BLACK                        | 653 (16.9)    |
| HISPANIC/LATINO              | 245 (6.3)     |
| OTHER                        | 120 (3.1)     |
| PORTUGUESE                   | 29 (0.7)      |
| UNKNOWN                      | 364 (9.4)     |
| WHITE                        | 2220 (57.3)   |
| <b>MARITAL STATUS (%)</b>    |               |
| DIVORCED                     | 398 (10.3)    |
| MARRIED                      | 1106 (28.5)   |
| NA                           | 296 (7.6)     |
| SINGLE                       | 1873 (48.3)   |
| WIDOWED                      | 202 (5.2)     |
| <b>INSURANCE (%)</b>         |               |
| MEDICAID                     | 1542 (39.8)   |
| MEDICARE                     | 1472 (38.0)   |
| NA                           | 64 (1.7)      |
| OTHER                        | 123 (3.2)     |
| PRIVATE                      | 674 (17.4)    |
| <b>TYPE OF ADMISSION (%)</b> |               |
| DIRECT EMERGENCY             | 230 (5.9)     |
| DIRECT OBSERVATION           | 10 (0.3)      |
| ELECTIVE                     | 50 (1.3)      |

|                                                   |                       |
|---------------------------------------------------|-----------------------|
| EU OBSERVATION                                    | 5 (0.1)               |
| EMERGENCY WARD                                    | 2296 (59.3)           |
| OBSERVATION ADMIT                                 | 548 (14.1)            |
| SURGICAL SAME DAY ADMISSION                       | 155 (4.0)             |
| URGENT                                            | 581 (15.0)            |
| <b>ADMISSION LOCATION (%)</b>                     |                       |
| EMERGENCY ADMISSIONS                              | 1998 (51.6)           |
| INTERNAL TRANSFERS                                | 45 (1.2)              |
| REFERRALS                                         | 927 (23.9)            |
| TRANSFER FROM OTHER FACILITY                      | 898 (23.2)            |
| UNKNOWN                                           | 7 (0.2)               |
| <b>No. of COMORBIDITIES (MEDIAN [IQR])</b>        | 18.00 [12.00, 24.00]  |
| <b>HEPATITIS_A = 1 (%)</b>                        | 37 (1.0)              |
| <b>HEPATITIS_B = 1 (%)</b>                        | 746 (19.3)            |
| <b>HEPATITIS_C = 1 (%)</b>                        | 3186 (82.2)           |
| <b>HEPATITIS_D = 1 (%)</b>                        | 357 (9.2)             |
| <b>HEPATITIS_E = 1 (%)</b>                        | 3 (0.1)               |
| <b>HEPATIC_COMA = 1 (%)</b>                       | 311 (8.0)             |
| <b>PRE-ICU MEDICATIONS COUNT (MEDIAN [IQR])</b>   | 82.00 [36.00, 140.25] |
| <b>PRE-ICU PROCEDURES COUNT (MEDIAN [IQR])</b>    | 3.00 [2.00, 6.00]     |
| <b>DISPENSED MEDICATIONS COUNT (MEDIAN [IQR])</b> | 65.50 [33.00, 118.50] |
| <b>ICU MEDICATIONS COUNT (MEDIAN [IQR])</b>       | 54.00 [20.00, 154.00] |
| <b>ICU PROCEDURES COUNT (MEDIAN [IQR])</b>        | 7.00 [3.00, 14.00]    |
| <b>TOTAL LENGTH OF STAY (MEDIAN [IQR])</b>        | 2.00 [1.00, 4.00]     |
| <b>DISCHARGE_LOCATION (%)</b>                     |                       |
| AGAINST MEDICAL ADVICE                            | 170 (4.4)             |
| DEATH                                             | 522 (13.5)            |
| HOME-BASED CARE                                   | 1997 (51.5)           |
| HOSPICE CARE                                      | 100 (2.6)             |
| NA                                                | 18 (0.5)              |
| OTHER HEALTHCARE FACILITY                         | 110 (2.8)             |
| PSYCHIATRIC CARE                                  | 83 (2.1)              |
| REHABILITATION                                    | 191 (4.9)             |
| SKILLED NURSING/LONG-TERM CARE                    | 684 (17.7)            |
| <b>DISCHARGE OUTCOME = 1 (%)</b>                  | 522 (13.5)            |

294  
 295 The distribution of hepatitis types across racial groups is depicted in **Figure 3**. Hepatitis C was the most  
 296 prevalent condition across all racial groups, with White patients contributing the largest proportion. Among  
 297 Black and Hispanic/Latino patients, Hepatitis C was also the most common condition but showed slightly  
 298 smaller proportions compared to White patients, while Hepatitis B was notably more prevalent among  
 299 Asian patients compared to other racial groups. In addition, Hepatitis B disproportionately affects non-



300 White individuals compared to Whites. Hepatitis A, D, and E were observed in smaller proportions across  
 301 all racial groups, with Hepatitis E being particularly rare. Hepatic Coma was most common among White  
 302 patients, with smaller contributions from other racial groups.

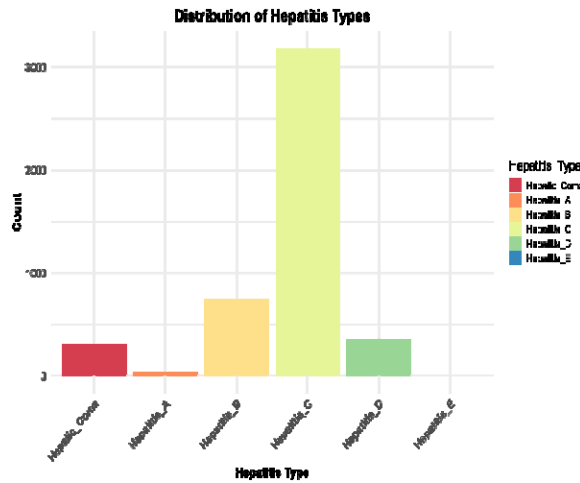

**Figure 2.** Distribution of hepatitis types among study participants

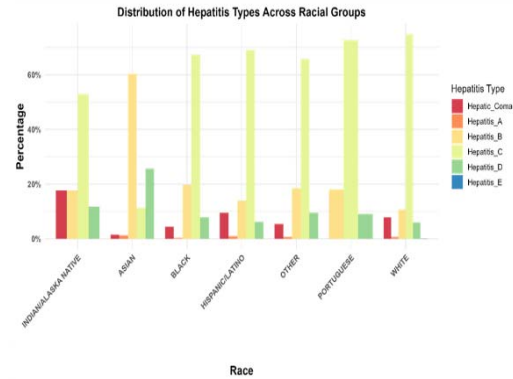

**Figure 3.** Distribution of hepatitis across racial groups

303 The distribution of total length of stay for hepatitis patients was highly skewed as commonly seen in  
 304 hospital records, with most patients having a short hospital stay (**Figure 4**). The median total length of  
 305 stay was 2 days (IQR: 1–4 days) as stated in **Table 1**, with some patients having an extended stay of over  
 306 30 days. Variations in length of stay were also observed based on admission location (**Figure 5**). For  
 307 instance, patients admitted from emergency admissions had shorter median stays compared to those  
 308 transferred from other facilities. Notably, patients transferred from other facilities exhibited a wider range  
 309 of lengths of stay, including outliers with significantly extended hospitalizations. These trends highlight  
 310 how admission pathways may influence the duration of ICU stays.

311

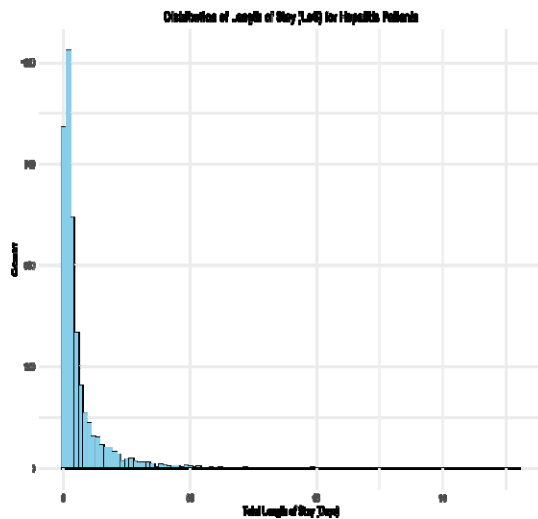

**Figure 4.** Distribution of total LoS for hepatitis patients

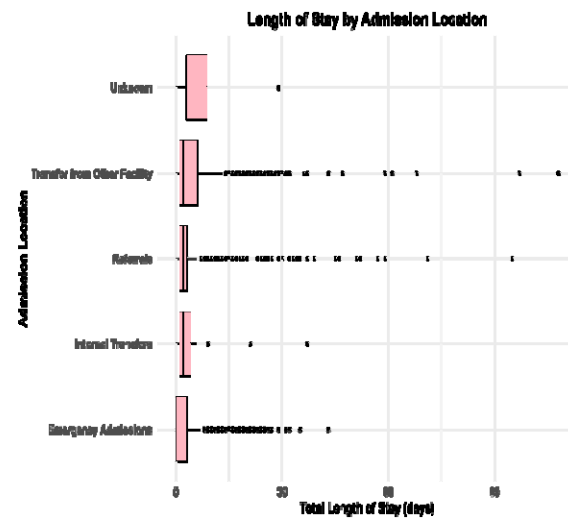

**Figure 5.** Length of stay by admission location

312 The boxplot in **Figure 6** illustrates the relationship between the total length of stay and discharge  
313 outcome. Patients with longer lengths of stay were more likely to have died, as indicated by the higher  
314 median and wider range of LoS in the "Died" group compared to the "Survived" group. **Figure 7** highlights  
315 the distribution of discharge locations among patients. The majority (51.5%, n = 1,997) were discharged  
316 to home-based care. Skilled nursing or long-term care facilities accounted for 17.7% (n = 684) of  
317 discharges, while 13.5% (n = 522) of patients died. Other notable discharge destinations included  
318 rehabilitation centers (4.9%, n = 191), hospice care (2.6%, n = 100), psychiatric care (2.1%, n = 83), and  
319 other healthcare facilities (2.8%, n = 110). A small proportion of patients left the hospital against medical  
320 advice (4.4%, n = 170).  
321  
322  
323

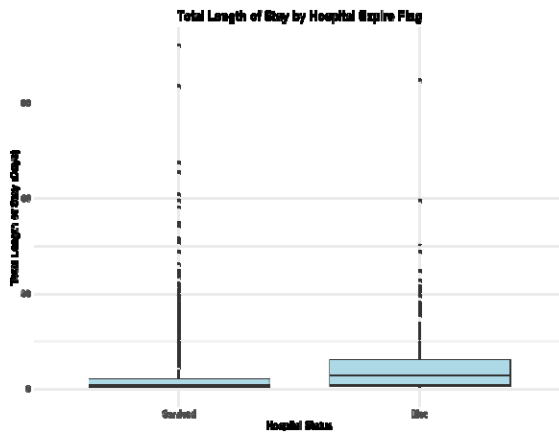

**Figure 6.** Discharge outcome based on total LoS

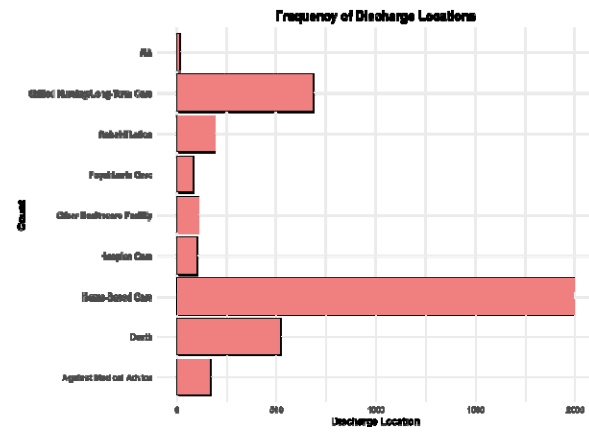

**Figure 7.** Distribution of discharge locations among patients

324  
325 **3.2. Model Results and Performance**  
326 Discharge Outcome (Died/Alive)

327 The Logistic Regression and Random Forest models were developed and evaluated to predict discharge  
328 outcomes (died/alive) for ICU-admitted hepatitis patients. These models were tested on test data and  
329 through cross-validation. Performance metrics for both models are presented in **Table 2**. On the test data,  
330 Logistic Regression yielded a Brier Score of 0.1302, an accuracy of 0.818, a Kappa of 0.622, and an  
331 ROC AUC of 0.887. Sensitivity and specificity were 0.73 and 0.87, respectively. The Random Forest  
332 model demonstrated a Brier Score of 0.0875, an accuracy of 0.87, a Kappa of 0.742, and an ROC AUC of  
333 0.95. Sensitivity and specificity for the Random Forest model were 0.78 and 0.94, respectively. Cross-  
334 validation results are also shown in **Table 2**, indicating the mean and standard deviation for each metric  
335 across repeated samples. The mean Brier Score for Random Forest was 0.089 ( $\pm 0.010$ ), while Logistic  
336 Regression had a mean Brier Score of 0.129 ( $\pm 0.011$ ). The Random Forest model had a mean accuracy  
337 of 0.87 ( $\pm 0.017$ ) and a mean Kappa of 0.729 ( $\pm 0.037$ ), compared to Logistic Regression's mean accuracy  
338 of 0.82 ( $\pm 0.02$ ) and mean Kappa of 0.629 ( $\pm 0.043$ ). Moreover, statistical comparisons were conducted to  
339 evaluate differences in performance metrics between the Logistic Regression and Random Forest  
340 models. The results indicated statistically significant differences ( $p < 0.001$ ) for all key metrics, including  
341 Brier Score, accuracy, Kappa, ROC AUC, sensitivity, and specificity. These findings demonstrated that the  
342 Random Forest model consistently outperformed Logistic Regression across all evaluated criteria.  
343 Figures 8 and 9 display the variable importance for the Logistic Regression and Random Forest models,  
344 respectively. The top predictors in the Logistic Regression model (**Figure 8**) were pre-ICU medications  
345 count, ICU medications count, and ICU procedures count, with sociodemographic factors such as race

346 and age also ranking among the top 10 variables. For the Random Forest model (**Figure 9**), ICU  
 347 medications count, ICU procedures count, and total LoS were identified as the most influential variables,  
 348 with race and age again appearing among the top 10 predictors. These findings highlight the consistent  
 349 importance of race and age as predictors, emphasizing the need to consider both clinical and  
 350 sociodemographic factors when analyzing discharge outcomes.

351 *Table 2. Performance metrics of Logistic Regression and Random Forest models on test and cross-validated data*

| Metrics     | Logistic Regression |                  | Random Forest |                  |
|-------------|---------------------|------------------|---------------|------------------|
|             | Test data           | Cross-validation | Test data     | Cross-validation |
| Brier Score | 0.1301607           | 0.129 ± 0.011    | 0.08772361    | 0.089 ± 0.010    |
| Accuracy    | 0.8166895           | 0.821 ± 0.020    | 0.87551300    | 0.870 ± 0.017    |
| Kappa       | 0.6220590           | 0.629 ± 0.043    | 0.74208369    | 0.729 ± 0.037    |
| ROC AUC     | 0.8865039           | 0.889 ± 0.017    | 0.94999924    | 0.948 ± 0.012    |
| Sensitivity | 0.7350158           | 0.736 ± 0.040    | 0.78233438    | 0.780 ± 0.033    |
| Specificity | 0.8792271           | 0.884 ± 0.019    | 0.94685990    | 0.937 ± 0.016    |

352

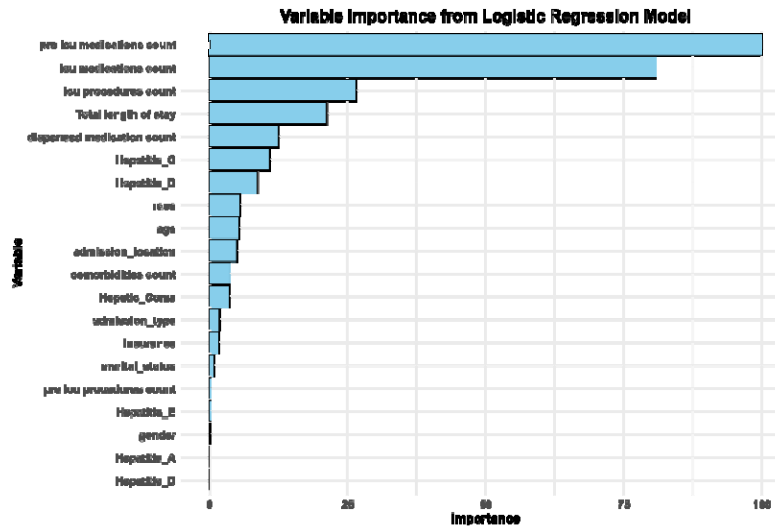

353

354

**Figure 8:** Variable importance for Logistic Regression

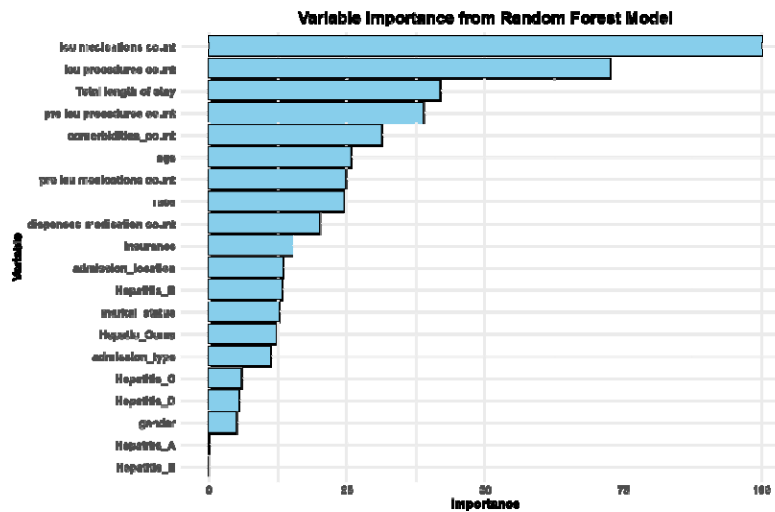

355

356

**Figure 9.** Variable importance for Random Forest classification

357 The calibration curves shown in **Figure 10** depict the relationship between predicted probabilities and  
 358 observed outcomes. **Figure 10a** illustrates the calibration curve for the Logistic Regression model, which  
 359 showed reasonable alignment, with minor deviations at the extremes. While **Figure 10b** represents the  
 360 calibration curve for the Random Forest model, which demonstrated closer alignment to the diagonal line,  
 361 indicating better calibration.

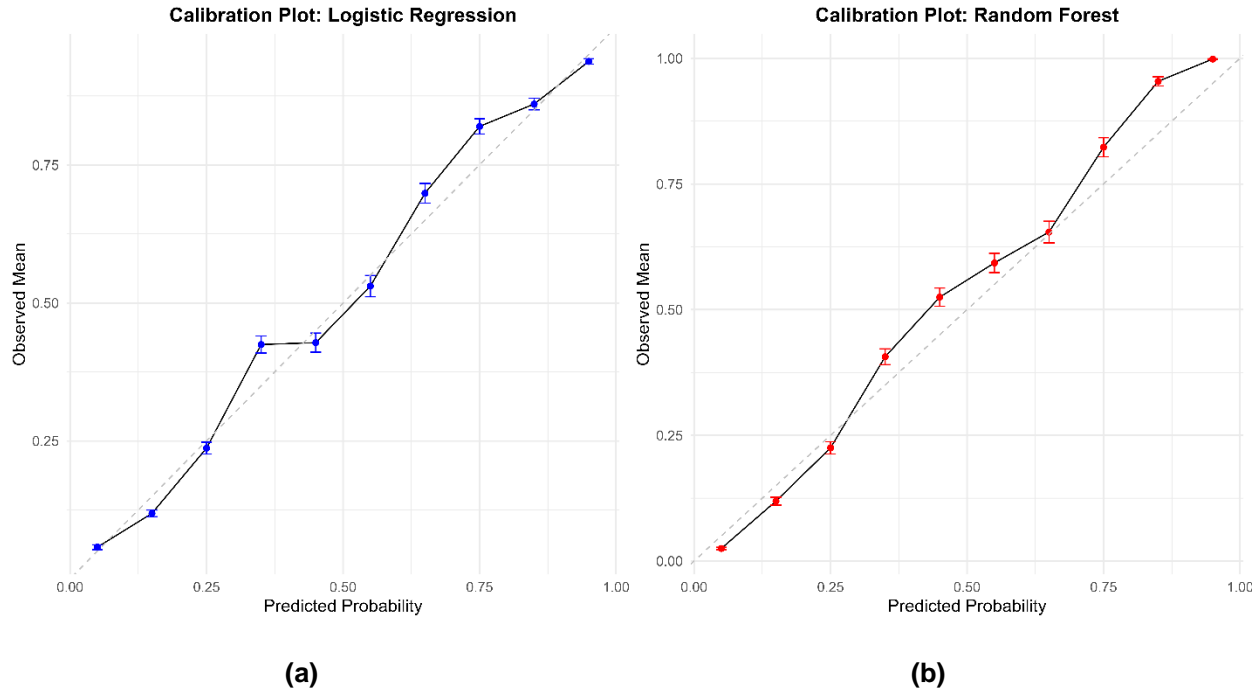

363 **Figure 10.** Calibration curves: (a) Logistic Regression, (b) Random Forest.

364 **Table 3** summarizes the confusion matrix results for both models. The Logistic Regression model showed  
 365 an agreement of 0.443 for observed class 0 and 0.2974 for class 1, with sensitivity and specificity values  
 366 of 0.773 and 0.696, respectively. The Random Forest model had higher agreement, with 0.483 for class 0  
 367 and 0.326 for class 1, a sensitivity of 0.844, and a specificity of 0.763.

368 *Table 3. Confusion matrix metrics for Logistic Regression and Random Forest models*

| Metric          | Logistic Regression |           | Random Forest |           |
|-----------------|---------------------|-----------|---------------|-----------|
|                 | Class 0             | Class 1   | Class 0       | Class 1   |
| Observed        | 0.5726993           | 0.4273007 | 0.5726993     | 0.4273007 |
| Predicted       | 0.5729394           | 0.4270606 | 0.5847769     | 0.4152231 |
| Agreement       | 0.4431088           | 0.2974701 | 0.4836014     | 0.326125  |
| Sensitivity     | 0.7737198           | 0.6961610 | 0.8444246     | 0.7632218 |
| Specificity     | 0.6961610           | 0.7737198 | 0.7632218     | 0.8444246 |
| PPV (Precision) | 0.7733956           | 0.6965524 | 0.8269844     | 0.7854216 |
| NPV             | 0.6965524           | 0.7733956 | 0.7854216     | 0.8269844 |

369 **Figures 11** and **12** illustrate the confusion matrix results for the **Logistic Regression** and **Random**  
 370 **Forest** models, respectively. In **Figure 12**, the Random Forest model demonstrates a stronger alignment  
 371 along the diagonal, indicating higher agreement between predicted and observed classes. The color  
 372 gradients in both **Figures 11** and **12** represent the predicted probabilities, with darker shades reflecting  
 373 higher probabilities of correct classification. Overall, the Random Forest model exhibits improved

374 sensitivity and specificity compared to the Logistic Regression model, aligning with the numerical results  
 375 presented in **Table 3**.

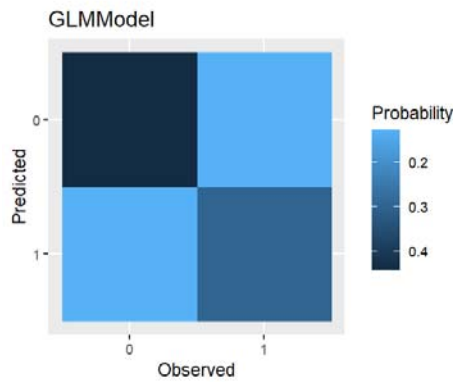

**Figure 11.** Confusion matrix for Logistic Regression

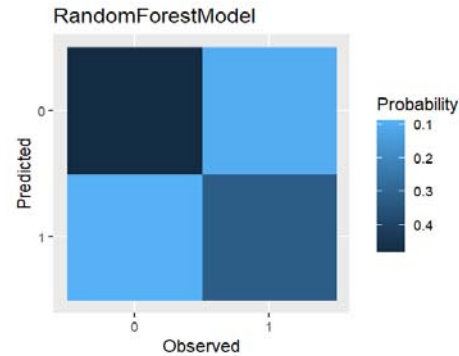

**Figure 12.** Confusion matrix for Random Forest

376 Total Length of Stay

377 While the previous models focused on classification outcome, the Generalized Additive Model (GAM) with  
 378 Negative Binomial distribution and the Random Forest Regression model were utilized to predict total  
 379 length of stay as discrete and continuous outcome respectively in the test data and through cross-  
 380 validation. The Generalized Additive Model (GAM) with a Negative Binomial family was applied to predict  
 381 LoS, as the mean in the dataset for LoS was 3.69, with a variance of 42.54, indicating overdispersion. On  
 382 the test data, the model achieved a Root Mean Squared Error (RMSE) of 2.9619, a Mean Absolute Error  
 383 (MAE) of 1.4237, and an R-squared ( $R^2$ ) of 0.7594, demonstrating its ability to explain 75.94% of the  
 384 variance in the LoS (**Table 4**). The deviance for the model was 2772.78, and the Akaike Information  
 385 Criterion (AIC) was 10410.0, reflecting the model's goodness-of-fit and complexity. Cross-validation was  
 386 conducted with 10 folds to assess the model's robustness. The cross-validated RMSE was 5.5212, while  
 387 the mean R-squared ( $R^2$ ) was 0.7601, and the mean MAE was 1.5634. These cross-validation results  
 388 highlight slightly higher variability and prediction errors compared to the test data, likely due to the  
 389 presence of extreme values or overdispersion in the data. Furthermore, as shown in **Figure 13**, the  
 390 majority of predictions are closely aligned with actual values, deviations are observed at higher LoS,  
 391 indicating potential challenges in predicting extended stays.

392 *Table 4. Performance metrics of General Additive Model with Negative Binomial*

| Metric                  | Test Data | Cross-Validation |
|-------------------------|-----------|------------------|
| Root Mean Squared Error | 2.9619    | 5.5212           |
| Mean Absolute Error     | 1.4237    | 1.5634           |
| R-squared               | 0.7594    | 0.7601           |

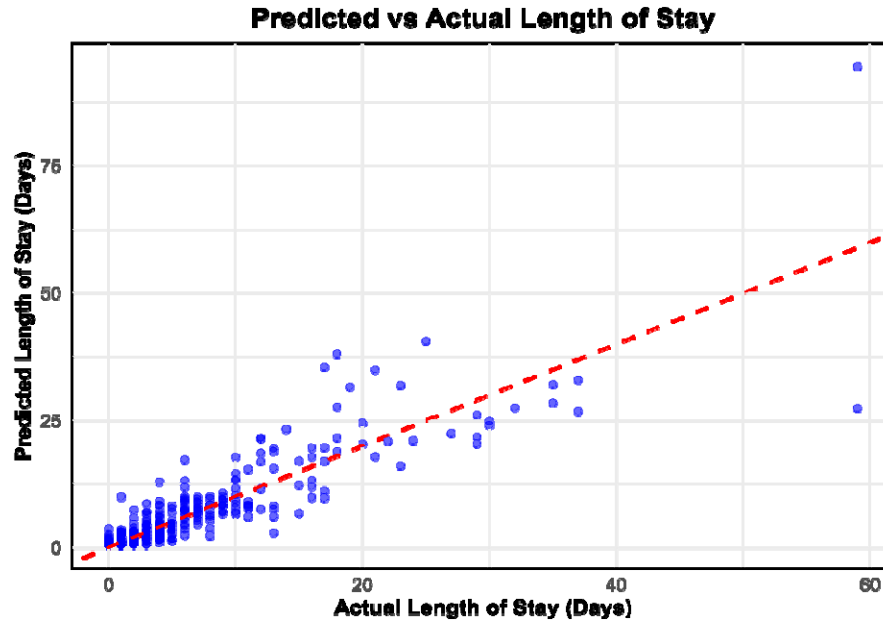

393

394 **Figure 13:** Predicted vs. Actual Length of Stay for the Generalized Additive Model (GAM)

395

396 *Table 5. Performance Metrics of Random Forest Regression Models*

| Metric                  | Test Data | Log Transformed Test Data | Cross-Validation      |
|-------------------------|-----------|---------------------------|-----------------------|
| Root Mean Squared Error | 3.271     | 0.3144                    | 0.295 ( $\pm 0.020$ ) |
| Mean Absolute Error     | 1.360     | 0.2377                    | 0.229 ( $\pm 0.014$ ) |
| R-squared               | 0.755     | 0.821                     | 0.838 ( $\pm 0.021$ ) |

397 The Random Forest model was subsequently applied after log-transforming the total Length of Stay  
 398 (LoS), which resulted in improved performance, achieving an RMSE of 0.3144, an R-squared ( $R^2$ ) of  
 399 0.821, and an MAE of 0.2377 on the test data. Cross-validation further confirmed the model's  
 400 consistency, with a mean RMSE of 0.295 ( $\pm 0.020$ ), a mean  $R^2$  of 0.838 ( $\pm 0.021$ ), and a mean MAE of  
 401 0.229 ( $\pm 0.014$ ). However, when back transformed to the original scale, the performance metrics were:  
 402 RMSE of 3.271,  $R^2$  of 0.755, and MAE of 1.360 (**Table 5**).

403 **Figure 14** illustrates the variable importance of the Random Forest Regression model for predicting  
 404 length of stay. The most influential predictors were the number of ICU medications and procedures,  
 405 comorbidities count, and pre-ICU procedure count. While clinical factors were most prominent,  
 406 sociodemographic variables such as age and race also emerged as notable predictors, highlighting their  
 407 potential impact on length of stay alongside clinical characteristics. The scatter plots in **Figure 15**  
 408 illustrate the relationship between predicted and actual Length of Stay values for the Random Forest  
 409 Regression model. **Figure 15a** presents the scatter plot for the log-transformed data, where a strong  
 410 linear relationship is observed, with predictions closely aligning with the actual values. In contrast, **Figure**  
 411 **15b** displays the scatter plot for the original Length of Stay data, where greater dispersion is evident,  
 412 particularly for higher values.

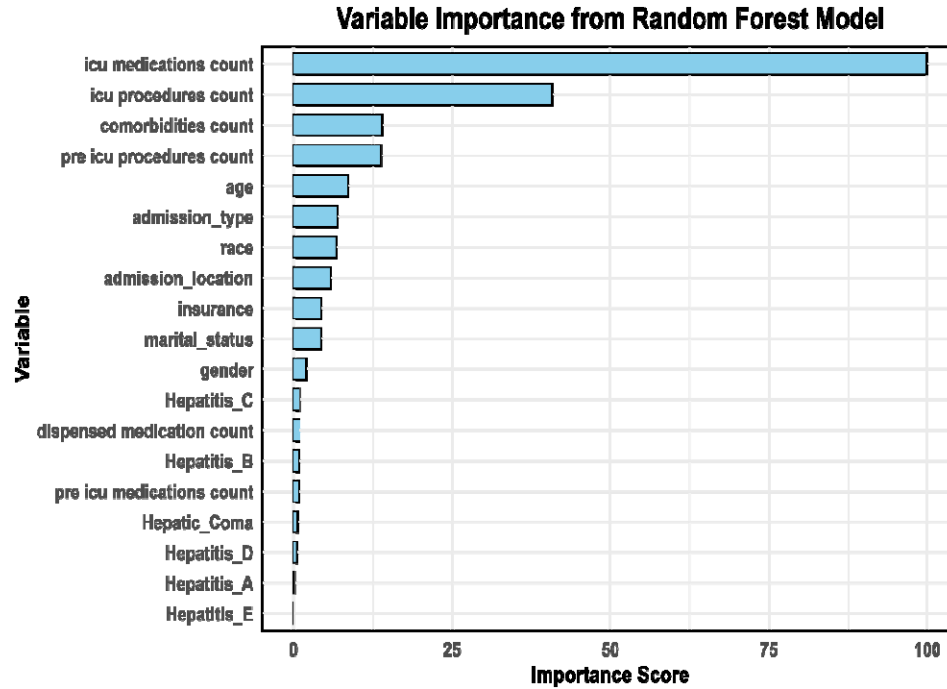

413

Figure 14. Variable Importance for Random Forest Regression Model

414

415

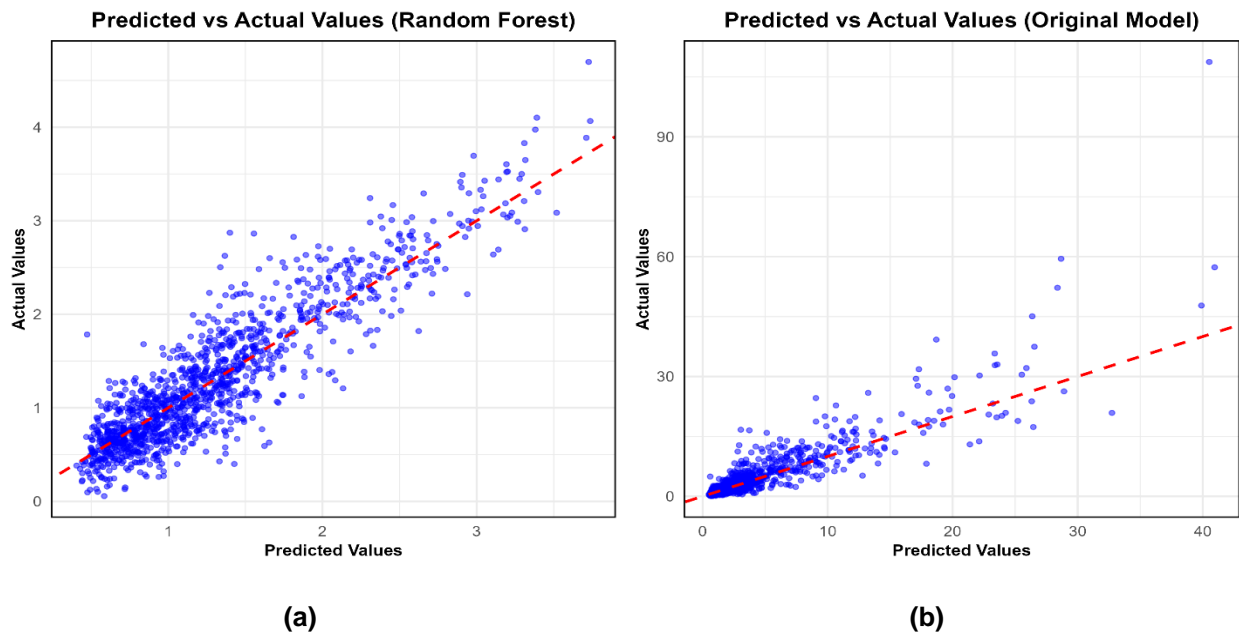

416

Figure 15: Predicted vs. Actual Length of Stay for the Random Forest Regression Model: (a) Log-Transformed Data and (b) Normal Data.

417

418

419

420

421

422 Discharge Location

423 Building on the evaluation of model performance for previous outcomes, the focus now turns to predicting  
 424 discharge location. The Gradient Boosting Model (GBM) was evaluated on test data, achieving a Brier  
 425 Score of 0.589, an accuracy of 0.558, a Kappa of 0.2110, and an ROC AUC of 0.740 (Table 6). Cross-  
 426 validation analysis showed a mean Brier Score of 0.5950 ( $\pm 0.0206$ ), a mean accuracy of 0.559 ( $\pm 0.227$ ),  
 427 and a mean Kappa of 0.2077 ( $\pm 0.0391$ ), indicating stable performance across folds. The Multinomial  
 428 Regression Model produced an accuracy of 0.5639 (95% CI: 52.81% - 59.91%) on the test data, with a  
 429 Kappa value of 0.2037 (Table 6). The decay tuning parameter during cross-validation yielded consistent  
 430 results, with accuracy values around 0.5658 ( $\pm 0.153$ ) and Kappa values near 0.2335 ( $\pm 0.30$ ). Significant  
 431 predictors ( $p < 0.05$ ) identified in this model included gender, marital status, insurance type, type of  
 432 admission, number of comorbidities, and number of ICU procedures and medications. Figure 16  
 433 illustrates the variable importance of the Gradient Boosting Model, highlighting the number of ICU  
 434 medications, comorbidities, age, total length of stay and race as the most influential predictors.

435 Table 6. Performance metrics of Gradient Boosting and Multinomial Regression model on test and cross-validated  
 436 data

| Metric      | Gradient Boosting Model |                         | Multinomial Regression |                        |
|-------------|-------------------------|-------------------------|------------------------|------------------------|
|             | Test Data               | Cross Validation        | Test Data              | Cross Validation       |
| Accuracy    | 55.87%                  | 0.5591 ( $\pm 0.227$ )  | 0.5639                 | 0.5658 ( $\pm 0.153$ ) |
| Kappa       | 0.2110                  | 0.2077 ( $\pm 0.0391$ ) | 0.2037                 | 0.2335 ( $\pm 0.30$ )  |
| Brier Score | 0.5898                  | 0.5950 ( $\pm 0.0206$ ) | -                      | -                      |
| ROC AUC     | 0.7407                  | 0.7319 ( $\pm 0.0282$ ) | -                      | -                      |

437

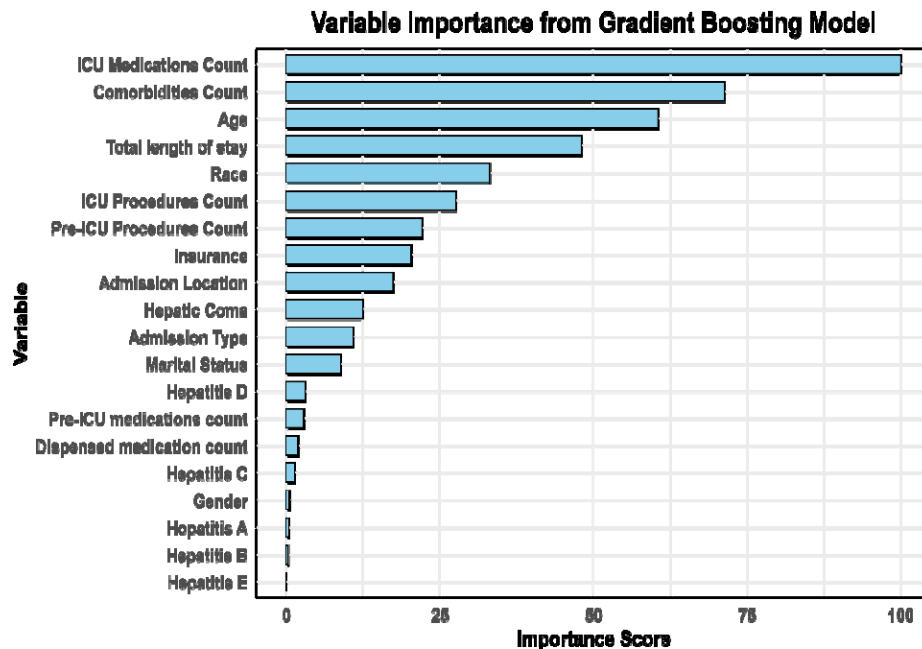

438

439 Figure 16. Variable importance for Gradient Boost model

440

441

442



#### 443 4. DISCUSSION

444 Despite significant advancements in critical care for hepatitis-related conditions, this study highlights the  
445 complexities associated with ICU LoS, discharge outcomes (died/alive), and discharge locations.  
446 Leveraging ML models, we successfully predicted these outcomes and identified key predictors, including  
447 ICU procedures, medication counts, comorbidities, and sociodemographic factors such as age and race.  
448 Notably, race consistently emerged as one of the top predictors across all models, underscoring its critical  
449 role in influencing health outcomes for hepatitis patients. This finding is particularly significant as it aligns  
450 with observed racial disparities in the raw data, suggesting systemic inequities. Additionally, Hepatitis C  
451 emerged as the most prevalent condition in our cohort, aligning with global epidemiological trends that  
452 underscore its significant burden on critical care systems (Brunner & Bruggmann, 2021; Petruzzello et  
453 al., 2016). These findings emphasize the potential of predictive analytics in not only identifying key drivers  
454 of health outcomes but also in addressing disparities, optimizing resource allocation, improving patient  
455 outcomes, and reducing healthcare costs.

456  
457 This study investigated the prediction of ICU LoS for hepatitis patients using ML models, including the  
458 Generalized Additive Model (GAM) with a Negative Binomial distribution and Random Forest regression.  
459 Random Forest demonstrated superior predictive accuracy, particularly after applying a log transformation  
460 to stabilize variance. The log-transformed Random Forest model achieved an  $R^2$  of 0.821 and an RMSE  
461 of 0.3144 on test data, effectively capturing complex interactions among predictors. By comparison, GAM  
462 with a Negative Binomial distribution achieved an  $R^2$  of 0.7594 and RMSE of 2.9619, effectively  
463 addressing overdispersion but yielding higher errors. The key predictors for LoS included ICU medication  
464 counts, ICU procedure counts, comorbidities, pre-ICU procedures, and patient age. These findings align  
465 with prior studies, such as Gwynn et al. (2019), which demonstrated that higher procedural and  
466 pharmacological interventions often correlate with disease severity and resource intensity, leading to  
467 longer ICU stays. Similarly, Tola Getachew Bekele et al. (2024) emphasized that prolonged ICU stays are  
468 associated with complications, readmissions, and sedative use, underscoring the importance of clinical  
469 management strategies to optimize LoS. Although the models performed well for shorter stays, predicting  
470 longer LoS posed challenges due to increased variability and extreme values, as reflected in scatter plot  
471 (Figures 13). Xu et al. (2022) observed similar challenges, reporting that ML models often struggle to  
472 predict longer stays due to the inherent variability of extended ICU durations. This study reflects these  
473 findings, with greater error dispersion observed in the upper range of LoS predictions. The performance of  
474 Random Forest in predicting LoS aligns with Iwase et al. (2022), who reported high predictive accuracy  
475 for ICU stays using Random Forest. Ensemble methods such as Random Forest excel in capturing  
476 nonlinear interactions and handling heterogeneous predictors, as further evidenced by Alghatani et al.  
477 (2021), who achieved 65% accuracy for LoS predictions in ICU datasets. While GAM with Negative  
478 Binomial distribution effectively addressed overdispersion, its higher cross-validation errors indicate that  
479 variability in extended LoS remains a challenge. Future research could incorporate additional clinical  
480 variables or hierarchical modeling techniques to enhance predictions for longer LoS.

481  
482 The prediction of discharge outcomes (alive vs. death) was conducted using Logistic Regression and  
483 Random Forest models. Random Forest outperformed Logistic Regression across all metrics, achieving  
484 an accuracy of 87.5%, a Kappa of 0.742, and an ROC AUC of 0.95 on test data. Logistic Regression  
485 achieved slightly lower metrics, with an accuracy of 81.67%, a Kappa of 0.622, and an ROC AUC of 0.89.  
486 These results highlight the robustness of ensemble methods like Random Forest in handling complex  
487 interactions among clinical and demographic predictors. Statistically significant predictors for discharge  
488 outcomes included ICU medication counts, ICU procedure counts, and total LoS, all of which reflect  
489 disease severity and the intensity of care and key variables in predicting LoS. Prolonged LoS has been  
490 linked to increased mortality, consistent with Moitra et al. (2016), who found that each additional ICU Day  
491 beyond seven days significantly raises mortality risk. Similar findings were reported by Lingsma et al.  
492 (2018) and Tola Getachew Bekele et al. (2024), who highlighted the correlation between extended LoS  
493 and mortality, emphasizing its role as both a predictor and consequence of severe illness.

494

495 Sociodemographic factors also played a crucial role in predicting discharge outcomes. Race, for instance,  
496 emerged as a significant predictor in our study, aligning with Olanipekun et al. (2021), who found  
497 disparities in ICU mortality among demographic groups. Age was another critical variable, consistent with  
498 Saadatmand et al. (2022), who identified age and Lactate dehydrogenase (LDH) levels as significant  
499 determinants of mortality. While LDH levels were unavailable in our dataset, the inclusion of demographic  
500 and clinical predictors supported robust outcome predictions.

501  
502 The prediction of discharge location presented unique challenges, primarily due to the small dataset of  
503 3,875 records and eight discharge categories. Gradient Boosting Model (GBM) and Multinomial  
504 Regression yielded moderate performance, with accuracies of 55.87% and 56.39% and Kappa values of  
505 0.2110 and 0.2037, respectively. These results highlight the complexities of multi-class prediction in  
506 critical care settings with limited data. The Synthetic Minority Oversampling Technique (SMOTE) was  
507 applied to address class imbalance but resulted in data loss, which limited the model's performance. Abad  
508 et al. (2021) addressed similar challenges using hierarchical classifiers and SMOTE to manage  
509 imbalanced multi-class datasets, suggesting that advanced techniques and larger datasets are critical for  
510 improving predictive accuracy. Additionally, as noted by Abad et al. (2021), discharge decisions are  
511 influenced by subjective factors such as caregiver preferences, resource availability, and social support,  
512 which may not be fully captured by clinical and demographic data alone. Top predictors for discharge  
513 location included gender, marital status, insurance type, admission type, number of comorbidities, and  
514 ICU procedures and medications. These findings align with Mickle and Deb (2022), who highlighted the  
515 importance of clinical and patient characteristics in discharge planning. The association of ICU  
516 procedures and medications with discharge location reflects the intensity of care required, further  
517 emphasizing their relevance in critical care contexts. Future studies should explore hierarchical  
518 classifiers, minimize the number of discharge categories, and incorporate additional variables such as  
519 functional status and physiological scores to enhance predictive performance. As highlighted by Mickle  
520 and Deb (2022), integrating larger datasets and advanced modeling techniques can provide more  
521 clinically actionable insights.

522  
523 This study has several limitations that warrant further consideration. First, the reliance on the MIMIC-IV  
524 database, which reflects a single institution's patient population and care practices, may limit the  
525 generalization of the findings to other healthcare settings with differing demographics or protocols.  
526 Second, the imbalanced distribution of outcomes, particularly for rare discharge destinations (e.g.,  
527 hospice, against medical advice), may have reduced model stability and predictive accuracy. While ML  
528 models like Random Forest demonstrated strong performance, their limited interpretability compared to  
529 simpler models like Logistic Regression poses challenges for clinical adoption. Future research should  
530 focus on validating these findings across diverse datasets to enhance generalizability. Addressing  
531 outcome imbalances through advanced techniques without data loss will be critical for better prediction of  
532 rare outcomes like hospice discharge or leaving against medical advice. Moreover, future studies could  
533 explore fitting a Generalized Additive Model with a Zero-Inflated Negative Binomial (ZINB) distribution to  
534 account for overdispersion and zero inflation in LoS data. Expanding this work to include real-time  
535 predictive tools integrated into Clinical Decision Support Systems (CDSS) could provide dynamic insights  
536 for resource allocation and care optimization.

## 537 538 **5. CONCLUSION**

539 This study highlights the potential of machine learning in advancing critical care for hepatitis patients. The  
540 models identified key predictors of LoS, discharge outcomes, and discharge locations, with clinical factors  
541 such as pre-ICU and ICU procedures and medication counts playing a significant role in determining  
542 these outcomes. Additionally, sociodemographic factors, including age and race, were consistently  
543 identified as important predictors, highlighting the presence of racial disparities among ICU-admitted  
544 patients diagnosed with hepatitis. These findings highlight the importance of addressing such disparities  
545 while using predictive analytics to optimize resource allocation, improve patient outcomes, and guide  
546 targeted interventions. Despite its strengths, the study also revealed challenges such as variability in

547 extended LoS and limited data for multi-class predictions, underscoring the need for further  
548 advancements in predictive modeling strategies.

549

## 550 **6. CONFLICT OF INTEREST**

551 The authors declare that there is no conflict of interest.

552

## 553 **7. FUNDING STATEMENT**

554 This study did not receive any funding.

555

## 556 **8. ETHICS STATEMENT**

557 The Indiana University Human Research Protection Program (HRPP) staff determined the analysis done  
558 in this study was not human subject research and did not require further Institutional Review Board (IRB)  
559 review before conducting the study. The study was conducted under the data use agreement governing  
560 MIMIC-IV, ensuring compliance with ethical standards for research involving human subjects. The  
561 collection of patient information and creation of the research resource was reviewed by the Institutional  
562 Review Board at the Beth Israel Deaconess Medical Center, who granted a waiver of informed consent  
563 and approved the data sharing initiative.

564

## 565 **9. DATA AVAILABILITY STATEMENT**

566 The datasets used for this study are available at [MIMIC-IV v3.0](https://mimic-iv.org/) only for credentialed users following the  
567 PhysioNet Credentialed Health Data Use Agreement (DUA).

568

## 569 **References**

- 570 [1] Abad, Z. S. H., Maslove, D. M., & Lee, J. (2021). Predicting Discharge Destination of Critically Ill  
571 Patients Using Machine Learning. *IEEE journal of biomedical and health informatics*, 25(3), 827–  
572 837. <https://doi.org/10.1109/JBHI.2020.2995836>
- 573 [2] Alghatani, K., Ammar, N., Rezgui, A., & Shaban-Nejad, A. (2021). Predicting intensive care unit  
574 length of stay and mortality using patient vital signs: Machine learning model development and  
575 validation. *JMIR Medical Informatics*, 9(5), e21347. <https://doi.org/10.2196/21347>
- 576 [3] An, Q., Rahman, S., Zhou, J., & Kang, J. J. (2023). A Comprehensive Review on Machine  
577 Learning in Healthcare Industry: Classification, Restrictions, Opportunities and Challenges.  
578 *Sensors*, 23(9), 4178. <https://doi.org/10.3390/s23094178>
- 579 [4] Arnab Kumar Ghosh, Geisler, B. P., & Ibrahim, S. A. (2021). Racial/ethnic and socioeconomic  
580 variations in hospital length of stay. *Medicine*, 100(20), e25976–e25976.  
581 <https://doi.org/10.1097/md.00000000000025976>
- 582 [5] Azur, M. J., Stuart, E. A., Frangakis, C., & Leaf, P. J. (2011). Multiple imputation by chained  
583 equations: what is it and how does it work? *International Journal of Methods in Psychiatric  
584 Research*, 20(1), 40–49. <https://doi.org/10.1002/mpr.329>
- 585 [6] Brunner, N., & Bruggmann, P. (2021). Trends of the global Hepatitis C disease burden: Strategies  
586 to achieve elimination. *Journal of Preventive Medicine and Public Health*, 54(4).  
587 <https://doi.org/10.3961/jpmph.21.151>
- 588 [7] Buuren, S. van, & Groothuis-Oudshoorn, K. (2011). mice: Multivariate Imputation by Chained  
589 Equations in R. *Journal of Statistical Software*, 45(3). <https://doi.org/10.18637/jss.v045.i03>
- 590 [8] Centers for Disease Control and Prevention. (2024, April 3). *2022 Viral Hepatitis Surveillance  
591 Report | CDC*. <https://www.cdc.gov/hepatitis/statistics/2022surveillance/index.htm>
- 592 [9] Choi, M. H., Kim, D., Choi, E. J., Jung, Y. J., Choi, Y. J., Cho, J. H., & Jeong, S. H. (2022).  
593 Mortality prediction of patients in intensive care units using machine learning algorithms based on  
594 electronic health records. *Scientific Reports*, 12(1). <https://doi.org/10.1038/s41598-022-11226-4>

- 595 [10] Couronné, R., Probst, P., & Boulesteix, A. L. (2018). Random forest versus logistic regression: A  
596 large-scale benchmark experiment. *BMC Bioinformatics*, 19(1), 270.  
597 <https://doi.org/10.1186/s12859-018-2264-5>
- 598 [11] Dubin, J. A., Bains, S. S., Rubén Monárrez, Gilmor, R., Swartz, G. N., Katanbaf, R. M., Mont, M.  
599 A., Nace, J., & Delanois, R. E. (2024). The Effect of Insurance Type on Length of Stay Following  
600 Total Knee Arthroplasty. *The Journal of Arthroplasty*. <https://doi.org/10.1016/j.arth.2024.07.009>
- 601 [12] Eskandari, M., Alizadeh Bahmani, A. H., Mardani-Fard, H. A., Karimzadeh, I., Omidifar, N., &  
602 Peymani, P. (2022). Evaluation of factors that influenced the length of hospital stay using data  
603 mining techniques. *BMC Medical Informatics and Decision Making*, 22(1).  
604 <https://doi.org/10.1186/s12911-022-02027-w>
- 605 [13] Fernandez, G. A., & Vatcheva, K. P. (2022). A comparison of statistical methods for modeling  
606 count data with an application to hospital length of stay. *BMC Medical Research Methodology*,  
607 22(1). <https://doi.org/10.1186/s12874-022-01685-8>
- 608 [14] Goldberger, A., Amaral, L., Glass, L., Hausdorff, J., Ivanov, P. C., Mark, R., ... & Stanley, H. E.  
609 (2000). PhysioBank, PhysioToolkit, and PhysioNet: Components of a new research resource for  
610 complex physiologic signals. *Circulation [Online]*. 101 (23), pp. e215–e220.
- 611 [15] Gwynn, M. E., Poisson, M. O., Waller, J. L., & Newsome, A. S. (2019). Development and  
612 validation of a medication regimen complexity scoring tool for critically ill patients. *American*  
613 *Journal of Health-System Pharmacy*, 76(Supplement\_2), S34–S40.  
614 <https://doi.org/10.1093/ajhp/zxy054>
- 615 [16] Hastie, T. and Tibshirani, R. (2014). Generalized Additive Models. In *Wiley StatsRef: Statistics*  
616 *Reference Online* (eds N. Balakrishnan, T. Colton, B. Everitt, W. Piegorisch, F. Ruggeri and J.L.  
617 Teugels). <https://doi.org/10.1002/9781118445112.stat03141>
- 618 [17] Hayes, R. M., Carter, P. R., Gollop, N. D., Reynolds, J., Uppal, H., Sarma, J., Chandran, S., &  
619 Potluri, R. (2016). 108 The Impact of Marital Status on Mortality and Length of Stay in Patients  
620 Admitted with Myocardial Infarction: Abstract 108 Table 1. *Heart*, 102(Suppl 6), A77.1-A77.  
621 <https://doi.org/10.1136/heartjnl-2016-309890.108>
- 622 [18] Hickman, D. (2018, January 3). *Choosing location after discharge wisely*. The Hospitalist.  
623 [https://www.the-hospitalist.org/hospitalist/article/155424/transitions-care/choosing-location-after-](https://www.the-hospitalist.org/hospitalist/article/155424/transitions-care/choosing-location-after-discharge-wisely)  
624 [discharge-wisely](https://www.the-hospitalist.org/hospitalist/article/155424/transitions-care/choosing-location-after-discharge-wisely)
- 625 [19] Ismail, N., & Jemain, A. (2007). Handling Overdispersion with Negative Binomial and Generalized  
626 Poisson Regression Models.  
627 [https://www.casact.org/sites/default/files/database/forum\\_07wforum\\_07w109.pdf](https://www.casact.org/sites/default/files/database/forum_07wforum_07w109.pdf)
- 628 [20] Johnson, A., Bulgarelli, L., Pollard, T., Gow, B., Moody, B., Horng, S., Celi, L. A., & Mark, R.  
629 (2024). MIMIC-IV (version 3.0). PhysioNet. <https://doi.org/10.13026/hxp0-hg59>.
- 630 [21] Johnson, A.E.W., Bulgarelli, L., Shen, L. Et al. MIMIC-IV, a freely accessible electronic health  
631 record dataset. *Sci Data* 10, 1 (2023). <https://doi.org/10.1038/s41597-022-01899-x>
- 632 [22] Kwak, C., & Clayton-Matthews, A. (2002). Multinomial logistic regression. *Nursing research*,  
633 51(6), 404–410. <https://doi.org/10.1097/00006199-200211000-00009>
- 634 [23] Levin, S., Barnes, S., Toerper, M., Debraine, A., DeAngelo, A., Hamrock, E., Hinson, J., Hoyer, E.,  
635 Dungarani, T., & Howell, E. (2020). Machine-learning-based hospital discharge predictions can  
636 support multidisciplinary rounds and decrease hospital length-of-stay. *BMJ Innovations*, 7(2),  
637 414–421. <https://doi.org/10.1136/bmjinnov-2020-000420>
- 638 [24] Liaw, A., & Wiener, M. (2002). Classification and regression by randomForest. *R News*, 2(3), 18–  
639 22. <https://CRAN.R-project.org/doc/Rnews/>
- 640 [25] Lingsma, H. F., Bottle, A., Middleton, S., Kievit, J., Steyerberg, E. W., & Marang-van de Mheen, P.  
641 J. (2018). Evaluation of hospital outcomes: The relation between length-of-stay, readmission, and  
642 mortality in a large international administrative database. *BMC Health Services Research*, 18(1).  
643 <https://doi.org/10.1186/s12913-018-2916-1>

- 644 [26] Mickle, C. F., & Deb, D. (2022). Early prediction of patient discharge disposition in acute  
645 neurological care using machine learning. *BMC Health Services Research*, 22(1).  
646 <https://doi.org/10.1186/s12913-022-08615-w>
- 647 [27] Moitra, V. K., Guerra, C., Linde-Zwirble, W. T., & Wunsch, H. (2015). Relationship between ICU  
648 length of stay and long-term mortality for elderly ICU survivors. *Critical Care Medicine*, 44(4), 1.  
649 <https://doi.org/10.1097/ccm.0000000000001480>
- 650 [28] Ng, M., Patrizia Maria Carrieri, Lindila Awendila, Maria Eugenia Socías, Knight, R., & Ti, L.  
651 (2024). Hepatitis C virus infection and hospital-related outcomes: A systematic review. *Canadian*  
652 *Journal of Gastroenterology & Hepatology*, 2024, 1–23. <https://doi.org/10.1155/2024/3325609>
- 653 [29] Olanipekun, T., Abe, T., Sobukonla, T., Tamizharasu, J., Gamo, L., Kuete, N. T., Bakinde, N.,  
654 Westney, G., & Snyder, R. H. (2021). Association between race and risk of ICU mortality in  
655 mechanically ventilated COVID-19 patients at a safety net hospital. *Journal of the National*  
656 *Medical Association*. <https://doi.org/10.1016/j.jnma.2021.09.003>
- 657 [30] Oracle Corporation. (2023). MySQL: The world's most popular open-source database (Version  
658 8.0) [Computer software]. Oracle. <https://www.mysql.com/>
- 659 [31] Oracle. (2021). *What is MySQL?* <https://www.oracle.com/mysql/what-is-mysql/>
- 660 [32] Peres, I. T., Hamacher, S., Oliveira, F. L. C., Thomé, A. M. T., & Bozza, F. A. (2020). What factors  
661 predict length of stay in the intensive care unit? Systematic review and meta-analysis. *Journal of*  
662 *Critical Care*, 60, 183–194. <https://doi.org/10.1016/j.jcrc.2020.08.003>
- 663 [33] Petruzzello, A., Marigliano, S., Loquercio, G., Cozzolino, A., & Cacciapuoti, C. (2016). Global  
664 epidemiology of hepatitis C virus infection: An up-date of the distribution and circulation of  
665 hepatitis C virus genotypes. *World Journal of Gastroenterology*, 22(34), 7824.  
666 <https://doi.org/10.3748/wjg.v22.i34.7824>
- 667 [34] Pradipta, G. A., Wardoyo, R., Musdholifah, A., Sanjaya, I. N. H., & Ismail, M. (2021). SMOTE for  
668 handling imbalanced data problem: A review. *Proceedings of the 2021 Sixth International*  
669 *Conference on Informatics and Computing (ICIC)*, 1–8.  
670 <https://doi.org/10.1109/ICIC54025.2021.9632912>
- 671 [35] R Core Team. (2023). R: A language and environment for statistical computing (Version 4.4.1)  
672 [Computer software]. R Foundation for Statistical Computing. <https://www.R-project.org/>
- 673 [36] RStudio Team. (2023). RStudio: Integrated development for R (Version 2024.4.2.764) [Computer  
674 software]. RStudio, PBC. <https://www.rstudio.com/>
- 675 [37] Smith, B. J. (2024). MachineShop: Machine learning models and tools (Version 3.8.0) [R  
676 package]. CRAN. <https://cran.r-project.org/package=MachineShop>
- 677 [38] Stoltzfus, J. C. (2011). Logistic regression: A brief primer. *Academic Emergency Medicine*, 18(10),  
678 1099–1104. <https://doi.org/10.1111/j.1553-2712.2011.01185.x>
- 679 [39] Tola Getachew Bekele, Melaku, B., Lemlem Beza Demisse, Legese Fekede Abza, & Awol Seid  
680 Assen. (2024). Outcomes and factors associated with prolonged stays among patients admitted  
681 to adult intensive care unit in a resource-limited setting: A multicenter chart review. *Scientific*  
682 *Reports*, 14(1). <https://doi.org/10.1038/s41598-024-64911-x>
- 683 [40] Torgo, L. (2010). *Data mining with R: Learning with case studies*. Chapman and Hall/CRC.  
684 Retrieved from <http://www.dcc.fc.up.pt/~ltorgo/DataMiningWithR>
- 685 [41] Venables, W. N., & Ripley, B. D. (2002). *Modern applied statistics with S* (4th ed.). Springer.  
686 <https://doi.org/10.1007/978-0-387-21706-2>
- 687 [42] Verma, V.K., Saxena, K., Banodha, U. (2024). Analysis Effect of K Values Used in K Fold Cross  
688 Validation for Enhancing Performance of Machine Learning Model with Decision Tree. In: Garg,  
689 D., Rodrigues, J.J.P.C., Gupta, S.K., Cheng, X., Sarao, P., Patel, G.S. (eds) *Advanced*  
690 *Computing. IACC 2023. Communications in Computer and Information Science*, vol 2053.  
691 Springer, Cham. [https://doi.org/10.1007/978-3-031-56700-1\\_30](https://doi.org/10.1007/978-3-031-56700-1_30)

- 692 [43] Wickham, H. (2016). *ggplot2: Elegant graphics for data analysis*. Springer-Verlag.  
693 <https://ggplot2.tidyverse.org>
- 694 [44] Wickham, H., Averick, M., Bryan, J., Chang, W., McGowan, L. D., François, R., Grolemund, G.,  
695 Hayes, A., Henry, L., Hester, J., Kuhn, M., Pedersen, T. L., Miller, E., Bache, S. M., Müller, K.,  
696 Ooms, J., Robinson, D., Seidel, D. P., Spinu, V., Takahashi, K., Vaughan, D., Wilke, C., Woo, K.,  
697 & Yutani, H. (2019). Welcome to the tidyverse. *Journal of Open Source Software*, 4(43), Article  
698 1686. <https://doi.org/10.21105/joss.01686>
- 699 [45] Wilimitis, D., & Walsh, C. G. (2023). Practical Considerations and Applied Examples of Cross-  
700 Validation for Model Development and Evaluation in Health Care: Tutorial. *JMIR AI*, 2(1), e49023.  
701 <https://doi.org/10.2196/49023>
- 702 [46] Wood, S. N. (2011). Fast stable restricted maximum likelihood and marginal likelihood estimation  
703 of semiparametric generalized linear models. *Journal of the Royal Statistical Society: Series B*  
704 (Statistical Methodology), 73(1), 3–36. <https://doi.org/10.1111/j.1467-9868.2010.00749.x>
- 705 [47] World Health Organization. (2023, October 27). *Hepatitis*. [Wwww.who.int](http://www.who.int).  
706 [https://www.who.int/health-topics/hepatitis/viral-hepatitis-in-the-world-map#tab=tab\\_1](https://www.who.int/health-topics/hepatitis/viral-hepatitis-in-the-world-map#tab=tab_1)
- 707 [48] World Health Organization. (2024, April 9). *WHO sounds alarm on viral hepatitis infections*  
708 *claiming 3500 lives each day*. [https://www.who.int/news/item/09-04-2024-who-sounds-alarm-on-](https://www.who.int/news/item/09-04-2024-who-sounds-alarm-on-viral-hepatitis-infections-claiming-3500-lives-each-day)  
709 [viral-hepatitis-infections-claiming-3500-lives-each-day](https://www.who.int/news/item/09-04-2024-who-sounds-alarm-on-viral-hepatitis-infections-claiming-3500-lives-each-day)
- 710 [49] Wrld, A. (2024, September 10). *Random Forest: The Ultimate Guide to Regression and*  
711 *Classification*. Medium. [https://medium.com/@adeevmardia/random-forest-the-ultimate-guide-to-](https://medium.com/@adeevmardia/random-forest-the-ultimate-guide-to-regression-and-classification-33506d6cf865)  
712 [regression-and-classification-33506d6cf865](https://medium.com/@adeevmardia/random-forest-the-ultimate-guide-to-regression-and-classification-33506d6cf865)
- 713 [50] Xu, Z., Zhao, C., Scales, C. D., Henao, R., & Goldstein, B. A. (2022). Predicting in-hospital length  
714 of stay: a two-stage modeling approach to account for highly skewed data. *BMC Medical*  
715 *Informatics and Decision Making*, 22(1). <https://doi.org/10.1186/s12911-022-01855-0>
- 716 [51] Yoshida, K., & Bartel, A. (2022). *tableone: Create 'Table 1' to describe baseline characteristics*  
717 *with or without propensity score weights (Version 0.13.2) [R package]*. CRAN. [https://CRAN.R-](https://CRAN.R-project.org/package=tableone)  
718 [project.org/package=tableone](https://CRAN.R-project.org/package=tableone)
- 719 [52] Zeileis, A., Kleiber, C., & Jackman, S. (2015). *Regression Models for Count Data in R*. The  
720 Comprehensive Archive R Network. [https://cran.r-](https://cran.r-project.org/web/packages/pscl/vignettes/countreg.pdf)  
721 [project.org/web/packages/pscl/vignettes/countreg.pdf](https://cran.r-project.org/web/packages/pscl/vignettes/countreg.pdf)
- 722 [53] Zhang, Z., Zhao, Y., Canes, A., Steinberg, D., Lyashevskaya, O., & written on behalf of AME Big-  
723 Data Clinical Trial Collaborative Group (2019). Predictive analytics with gradient boosting in  
724 clinical medicine. *Annals of translational medicine*, 7(7), 152.  
725 <https://doi.org/10.21037/atm.2019.03.29>
- 726 [54] Zwanenburg, A. (2022, December 16). *Performance metrics*. R-Project.org. [https://cran.r-](https://cran.r-project.org/web/packages/familiar/vignettes/performance_metrics_precompiled.html)  
727 [project.org/web/packages/familiar/vignettes/performance\\_metrics\\_precompiled.html](https://cran.r-project.org/web/packages/familiar/vignettes/performance_metrics_precompiled.html)
